# Supplementary material for: Heterogeneous somatostatin-expressing neuron population in mouse ventral tegmental area
Source: eLife. 2020 Aug 4;9:e59328. doi: 10.7554/eLife.59328 (PMC7440918; doi:10.7554/eLife.59328)
Supplement: Figure 1—source data 1. [file elife-59328-fig1-data1.xlsx]

## Sheet: Sheet1
Fig.1b	IHC-based counting
	Sst							TH							Sst+Th
bregma	Mouse 1	Mouse 2	Mouse 3	mean	sem		bregma	Mouse 1	Mouse 2	Mouse 3	mean	sem		bregma	Mouse 1	Mouse 2	Mouse 3	mean	sem
-2.8	6	9	4	6.33333	1.45297		-2.8	228	142	232	200.667	29.3561		-2.8	0	0	0	0	0
-2.93	5	6	11	7.33333	1.85592		-2.93	249	133	237	206.333	36.8299		-2.93	0	0	0	0	0
-3.11	2	34	24	20	9.45163		-3.11	326	161	391	292.667	68.4552		-3.11	0	0	0	0	0
-3.29	1	9	17	9	4.6188		-3.29	404	171	361	312	71.5844		-3.29	0	1	1	0.666667	0.333333
-3.38	2	11	8	7	2.64575		-3.38	321	210	334	288.333	39.346		-3.38	0	0	2	0.666667	0.666667
-3.47	0	55	10	21.6667	16.9148		-3.47	439	358	396	397.667	23.3975		-3.47	0	2	0	0.666667	0.666667
-3.56	30	76	23	43	16.6233		-3.56	316	262	308	295.333	16.8259		-3.56	5	9	2	5.33333	2.02759
-3.69	65	82	113	86.6667	14.0515		-3.69	221	237	223	227	5.03322		-3.69	12	11	10	11	0.57735
Fig. 1c	ISH-based counting
	Sst								DAT (Slc6a3)								Sst+DAT (Slc6a3)
	Mouse 1	Mouse 2	Mouse 3	Mouse 4	mean	sem			Mouse 1	Mouse 2	Mouse 3	Mouse 4	mean	sem			Mouse 1	Mouse 2	Mouse 3	Mouse 4	mean	sem
-3.07	6	10	10	10	9	1		-3.07	259	184	123	354	230	49.818		-3.07	0	0	0	0	0	0
-3.27	13	19	5	9	11.5	2.98608		-3.27	133	257	243	294	231.75	34.6299		-3.27	0	0	0	0	0	0
-3.51	6	9	17	1	8.25	3.35099		-3.51	119	249	120	170	164.5	30.5791		-3.51	1	0	0	0	0.25	0.25
-3.63	7	17	13	12	12.25	2.05649		-3.63	310	249	183	166	227	32.952		-3.63	0	0	2	0	0.5	0.5
-3.79	17	64	17	20	29.5	11.5217		-3.79	242	140	225	222	207.25	22.845		-3.79	0	0	0	0	0	0
-3.87	24	54	36	17	32.75	8.09707		-3.87	140	67	158	200	141.25	27.759		-3.87	0	0	1	2	0.75	0.478714
