# Supplementary material for: Heterogeneous somatostatin-expressing neuron population in mouse ventral tegmental area
Source: eLife. 2020 Aug 4;9:e59328. doi: 10.7554/eLife.59328 (PMC7440918; doi:10.7554/eLife.59328)
Supplement: Figure 5—source data 1. [file elife-59328-fig5-data1.xlsx]

## Sheet: Sheet1
Fig.5a. Main moprhological featuers of the Sst neuron subtypes.
		Cell body area, mm2				# processes				# branching points				Mean of intersections
Cell # /subtype		ADP	Delayed	HFF		ADP	Delayed	HFF		ADP	Delayed	HFF		ADP	Delayed	HFF
1		121.6	116.7	201.1		6	5	6		4	3	2		3.018	2.407	1.547
2		194.2	152.1	89.9		9	8	7		4	3	3		3.827	1.903	3.919
3		107.9	167.3	154.1		7	9	8		1	4	4		2.518	2.797	3.185
4		176.5	221.4	128.9		7	9	5		3	4	2		3.143	4.748	2.315
5		145.4	263.8	71.7		7	6	4		3	1	1		2.085	3.486	1.148
6		282.8	266.2	109.7		5	8	6		1	3	0		2.968	3.5	3.14
7		127.5	194.8	88.1		4	7	7		0	3	5		2.157	3.841	1.867
8		101	204	98.5		4	8	6		2	2	2		2.569	2.158	2.304
9		168.6	115.7			5	12			1	5			1.779	5.007
10		92.9	152.8			8	9			3	4			2.021	4.121
11		141	222.2			6	6			3	3			2.419	4.292
12		97.3	230.8			6	8			3	4			2.499	1.749
13		118.6	95.2			8	13			5	5			2.757	3.21
14		121.7	142.8			8	9			2	3			4.151	1.814
15		126.1	168.4			5	15			0	8			2.904	3.094
16		157.5	112			4	8			1	4			2.176	2.975
17		143.5	218.9			7	10			3	6			3.299	4.618
18		262.3	312.9			6	13			2	6			3.383	5.429
19		47.7	225.3			2	14			0	9			2.342	5.305
20		119.1	137.6			12	7			6	4			2.735	3.115
21		153.8				2				0				1.7
