# Supplementary material for: Heterogeneous somatostatin-expressing neuron population in mouse ventral tegmental area
Source: eLife. 2020 Aug 4;9:e59328. doi: 10.7554/eLife.59328 (PMC7440918; doi:10.7554/eLife.59328)
Supplement: Figure 6—source data 1. [file elife-59328-fig6-data1.xlsx]

## Sheet: Fig.6b
Figure 6b - proprtion of Sst neurons molecular subtypes according to RNAscope results
	2male coronal		2 female coronal		2male horiz		2 female horiz
	# cells	in %	# cells	in %	# cells	in %	# cells	in %		Average %
Som + Vglut	46	32	41	18	55	11	42	10		17.75
Som + Vgat	87	60	177	79	399	79	356	82		75
Som + Dat	4	3	0	0	2	1	2	0.5		1.125
Som + Vglut + Vgat	6	4	6	3	44	9	23	5		5.25
Som + Vglut + Dat	0	0	0	0	1	0.5	0	0		0.125
Som + Vgat + Dat	0	0	0	0	2	1	8	2		0.75
Som + Vgat + Vglut + Dat	1	1	1	0.5	0	0	3	1		0.625

## Sheet: Fig.6c
Fig. 6c - assignments of the PatchSeq cells to the molecular clusters of the reference dataset (bootstrapping procedure).
								Cluster # to wich the cell was assigned with the highest probability
	Cluster molecular identity	GABA	DA	Glu	Glu	GABA	GABA
	Cluster name	X.3	X.5	X.6	X.7	X12	X13
Cell name
c53		0.0053	0.6294	0.2002	0.755	0.853	0.8554	3
c55		0.0002	0.9013	0.3908	0.7194	0.7527	0.7695	3
c80		0.0004	0.691	0.3249	0.8782	0.9641	0.7912	3
c93		0.0124	0.5798	0.1068	0.9936	0.7026	0.683	3
c94		0.0213	0.5657	0.1081	0.8728	0.7919	0.8737	3
c110		0.0103	0.2782	0.173	0.8377	0.9436	0.9524	3
c179		0.0151	0.2388	0.5012	0.6345	0.9128	0.8808	3
c184		0.0011	0.9147	0.2481	0.9677	0.5496	0.7738	3
c204		0	0.1104	0	0.9992	0.9998	0.997	3.6
c205		0	0.3441	0	1	1	1	3.6
c60		0	0.1679	0	0.9998	1	1	3.6		ADP
c76		0	0.1396	0	0.9986	0.986	0.9915	3.6
c78		0	0.712	0.1578	0.9637	0.8776	0.9949	3
c79		0	0.4659	0	0.9997	0.9635	0.9553	3.6
c84		0	0.5306	0	0.9926	0.9095	0.9755	3.6
c90		0	0.2673	0	1	0.9999	0.9998	3.6
c96		0	0.2463	0	0.9892	0.9945	0.9874	3.6
c103		0	0.5273	0	0.9122	0.9083	0.9778	3.6
c106		0	0.5426	0	0.9045	0.8843	0.7202	3.6
c149		0	0.3086	0	1	1	0.9999	3.6
c164		0	0.7175	0	0.8546	0.9968	0.9769	3.6
c168		0	0.523	0	0.9999	0.9989	0.9974	3.6
c171		0	0.1377	0	0.9999	0.9988	0.9996	3.6
c175		0	0.7368	0	0.9676	0.9978	0.9743	3.6
c180		0	0.1144	0	0.9991	1	1	3.6
c185		0	0.2507	0	0.9994	1	1	3.6
c196		0	0.1747	0	0.9967	0.9965	0.9828	3.6
c61		0	0.2184	0	0.9886	0.9756	0.9952	3.6
c177		0.3141	0	0	1	1	1	5.6
c152		0	0.1645	0	1	1	1	3.6
c52		0.6291	0.713	0.9381	0.7089	0	0	12.13
c45		0	0.9582	0.9693	0.4889	0	0	3.12.13
c192		0	0	0	0.9996	0.9998	1	3.5.6
c72		0	0	0	1	1	1	3.5.6
c150		0	0	0	1	1	1	3.5.6
c173		0	0	0	0.9976	0.9996	1	3.5.6
c44		0	0	0	0.9974	0.9999	0.9988	3.5.6
c104		0.2073	0.4898	0.6877	0.6554	0.2649	0.469	NA
c183		0.0519	0.7672	0.1495	0.9264	0.4919	0.596	NA
c62		0.2462	0.5823	0.3632	0.5411	0.6673	0.4061	NA
c64		0.2149	0.2731	0.449	0.8155	0.4528	0.7098	NA
c87		0.1928	0.4257	0.2565	0.55	0.8642	0.6115	NA
c95		0.1282	0.3549	0.2022	0.7904	0.8686	0.6746	NA
c77		0.0027	0.8704	0.1952	0.6935	0.9088	0.7313	3
c81		0.0123	0.6481	0.2065	0.8051	0.779	0.8075	3
c88		0	0.3964	0	0.9153	0.9954	0.9753	3.6
c91		0.0003	0.9649	0.4399	0.1755	0.8392	0.8121	3		HFF
c101		0.0059	0.8466	0.8909	0.1537	0.7709	0.2719	3
c105		0.1008	0.1332	0.4609	0.599	0.983	0.6508	NA
c159		0.0001	0.9971	0.2855	0.2005	0.8538	0.4621	3
c170		0	0.179	0	1	1	1	3.6
c200		0	0	0.9673	0.7678	0.9977	0.9973	3.5
c147		0	0	0	1	1	1	3.5.6
c169		0.2795	0	0	1	1	1	5.6
c176		0	0.8972	0.2885	0.8302	0.9097	0.9676	3
c178		0.9341	0.0965	0.781	0.2203	0.3358	0.7915	5		Delayed
c190		0.3812	0	0	1	1	1	5.6
c198		0.8432	0.0037	0.3963	0.998	0.9584	0.9954	5
c199		0	0	0	0.9998	1	1	3.5.6
c202		0.8427	0	0	1	1	1	5.6
c73		0.6739	0	0	1	1	1	5.6
