# Supplementary material for: Heterogeneous somatostatin-expressing neuron population in mouse ventral tegmental area
Source: eLife. 2020 Aug 4;9:e59328. doi: 10.7554/eLife.59328 (PMC7440918; doi:10.7554/eLife.59328)
Supplement: Figure 7—figure supplement 2—source data 1. [file elife-59328-fig7-figsupp2-data1.xlsx]

## Sheet: Sheet1
	Fig.7 - figure supplement 2				Fig. 7c	Fig. 7f					Fig. 7e
DA cell name	Cell 1	Cell 2	Cell3	Cell4	Cell5	Cell6	Cell7	Cell8	Cell9	Cell10	Cell11
Amplitudes of evoked IPSCs in particular DA cell, during optical stimulation of the neighbouring ADP Sst neurons (pA)	44.8	118.5	16.3	59.2	28.1	42.2	54.7	218.4	10.2	22.3	14
	58.6	73.8	25.5	41.7	31.8	49.5	31.2	140.4	10.8	23.6	10.1
	45.8	39.1	35.2	40.8	28	58.5	32.3	111.1	11.4	24.2	7.8
	65.5	148.2	18.1	61.6	24.1	66.5	45.4	148.5		17.3	15.8
	49	100.6	19.6	31.1	41.6	54.9	32.3	104.4		23.4	29.1
	75.4	66.2	21.1	19.1	33.9	65.3	34.1	188.4		20	16.9
	55.8	73.3	29	20.1	37.6	64.5	18.4	143.3		23.6	11
	68.6	138.8	35.4	22.4		44.9	31.4	43.4		18.4	17
	54.1	31.5	20.6	18.6		66		70.8		16.3	14.1
	54.3	107.3	15.2	17.9		43.7		15.9		21.7	7.8
	41.4	61	35.2	21.4		61.1				24.5	16.4
	80.6	103.9	62.3	20.1		62.5					13.1
	53.9	68.4	19.8	16.3		31.8					17.1
	54.9	50.7	21.2			60.8					11.8
	41	21.6	36.8			41					11.9
	80.9	29.6	19.5			44.8
	35	55	21.1			29.6
	62	47.3	28.9			34.1
	82.8	71.5	23.7			77.6
	70.2		14.7			39.3
	56.7					45
	58.3					25.2
	88.6					67.5
	83.4
	47
	88.9
	77
	77
	53.1
	44.1
	27.2
	44.9
	72.5
	35.9
	76.9
	53.2
	42.3
	46.7
	41.5
	44.9
	21.5
